# Supplementary material
Source: PubMed Central journal article supplement (PMC7331455)
Supplement: NIHMS1600200-supplement-Venn_Diagram.pdf [file NIHMS1600200-supplement-Venn_Diagram.pdf]

**Supporting Information**

**Spatiochemically Profiling Microbial Interactions with  
Membrane Scaffolded Desorption Electrospray Ionization-  
Ion Mobility- Imaging Mass Spectrometry and  
Unsupervised Segmentation**

Berkley M. Ellis<sup>1-5</sup>, Caleb N. Fischer<sup>1,3,4</sup>, Leroy B. Martin<sup>6</sup>, Brian O. Bachmann<sup>\*1,3,4</sup>, and  
John A. McLean<sup>\*1-5</sup>

<sup>1</sup>Department of Chemistry, Vanderbilt University, Nashville, TN USA

<sup>2</sup>Center for Innovative Technology, Vanderbilt University, Nashville, TN USA

<sup>3</sup>Institute of Chemical Biology, Vanderbilt University, Nashville, TN USA

<sup>4</sup>Institute for Integrative Biosystems Research and Education, Vanderbilt University, Nashville, TN USA

<sup>5</sup>Vanderbilt-Ingram Cancer Center, Vanderbilt University, Nashville, TN USA

<sup>6</sup>Waters Corporation, 34 Maple Street, Milford, MA USA

*\*Correspondence: John A. McLean, email: [john.a.mclean@vanderbilt.edu](mailto:john.a.mclean@vanderbilt.edu); : Brian O. Bachmann, email: [brian.bachmann@vanderbilt.edu](mailto:brian.bachmann@vanderbilt.edu)*

## Supplemental Tables and Figures

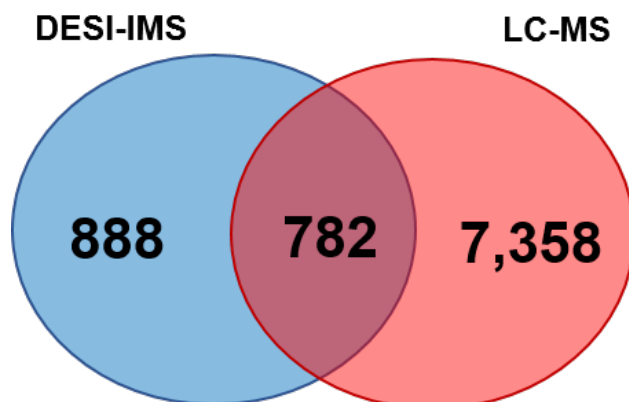

**Figure S1.** Venn Diagram showing the number of conserved and unique features between LC-MS and DESI-MS.

### LC-MS acquisition settings:

Liquid chromatography-mass spectrometry (LC-MS) experiments were performed on a Waters Synapt G2 HDMS (Milford, MA, USA) mass spectrometer equipped with a Waters nanoAcquity UPLC system and autosampler (Milford, MA, USA). Metabolites were separated on a reverse phase 1 mm × 100 mm HSS T3 C<sub>18</sub> column packed with 1.8-μm particles (Waters, Milford, MA, USA) held at 45°C. Liquid chromatography was performed using a 30-min gradient at a flow rate of 75 μL min<sup>-1</sup> using mobile phase A (0.1% formic acid in H<sub>2</sub>O) and mobile phase B (0.1% formic acid in ACN). The following elution gradient was used for analysis: 0 min, 99% A; 1 min, 99% A; 10 min, 40% A; 20 min, 1% A; 22 min, 1% A; 25 min, 99% A.

LC-MS analyses were run using high-resolution mode, with a capillary voltage of – 0.8 kV, source temperature at 100°C, sample cone voltage at 30 V, extraction cone voltage at 5 V, source gas flow of 400 mL min<sup>-1</sup>, desolvation gas temperature of 325°C, and He cell flow of 180 mL min<sup>-1</sup>. The data were acquired in negative ion mode from 50 to 1200 Da with a 1-s scan time; leucine enkephalin was used as the lock mass (*m/z* 554.262). All analytes were analyzed using MS<sup>E</sup> with an energy ramp from 10 to 40 eV and an injection volume of 5 μL.

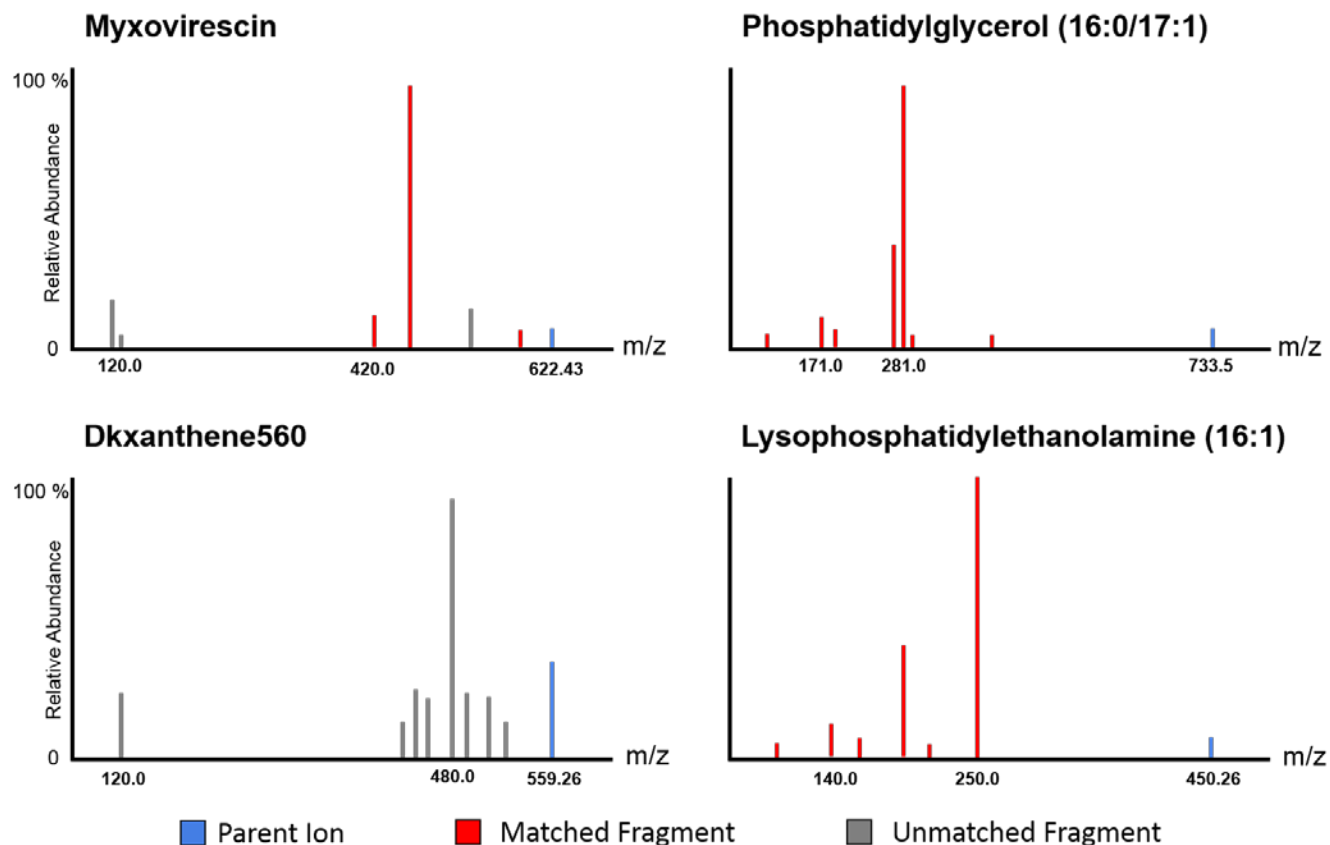

**Figure S2.** Fragmentation spectra of identified metabolites.

**Table S1.** Calculated values annotating sampling efficiency across methods (n=3).

| Sample                         | Dried Agar                              | Imprinting                              | Microporous Membrane Scaffold          |
|--------------------------------|-----------------------------------------|-----------------------------------------|----------------------------------------|
| Average TIC                    | 4.30x10 <sup>9</sup>                    | 9.84x10 <sup>9</sup>                    | 1.75x10 <sup>9</sup>                   |
| Significant Features (S/N ≥ 3) | 193                                     | 340                                     | 355                                    |
| Average Intensity*             | 27x10 <sup>3</sup> ± 14x10 <sup>3</sup> | 57x10 <sup>3</sup> ± 25x10 <sup>3</sup> | 27x10 <sup>3</sup> ± 5x10 <sup>3</sup> |
| Percent Covariance*            | 54.60%                                  | 44.10%                                  | 20.20%                                 |
| Average S/N*                   | 15.5 ± 10.6                             | 110.3 ± 49.65                           | 77.1 ± 15.0                            |

\* Calculated using Dkxanthene-534, Dkxanthene-560, Myxovirescin A, lyso-PE 16:1, and PG 16:0/17:1

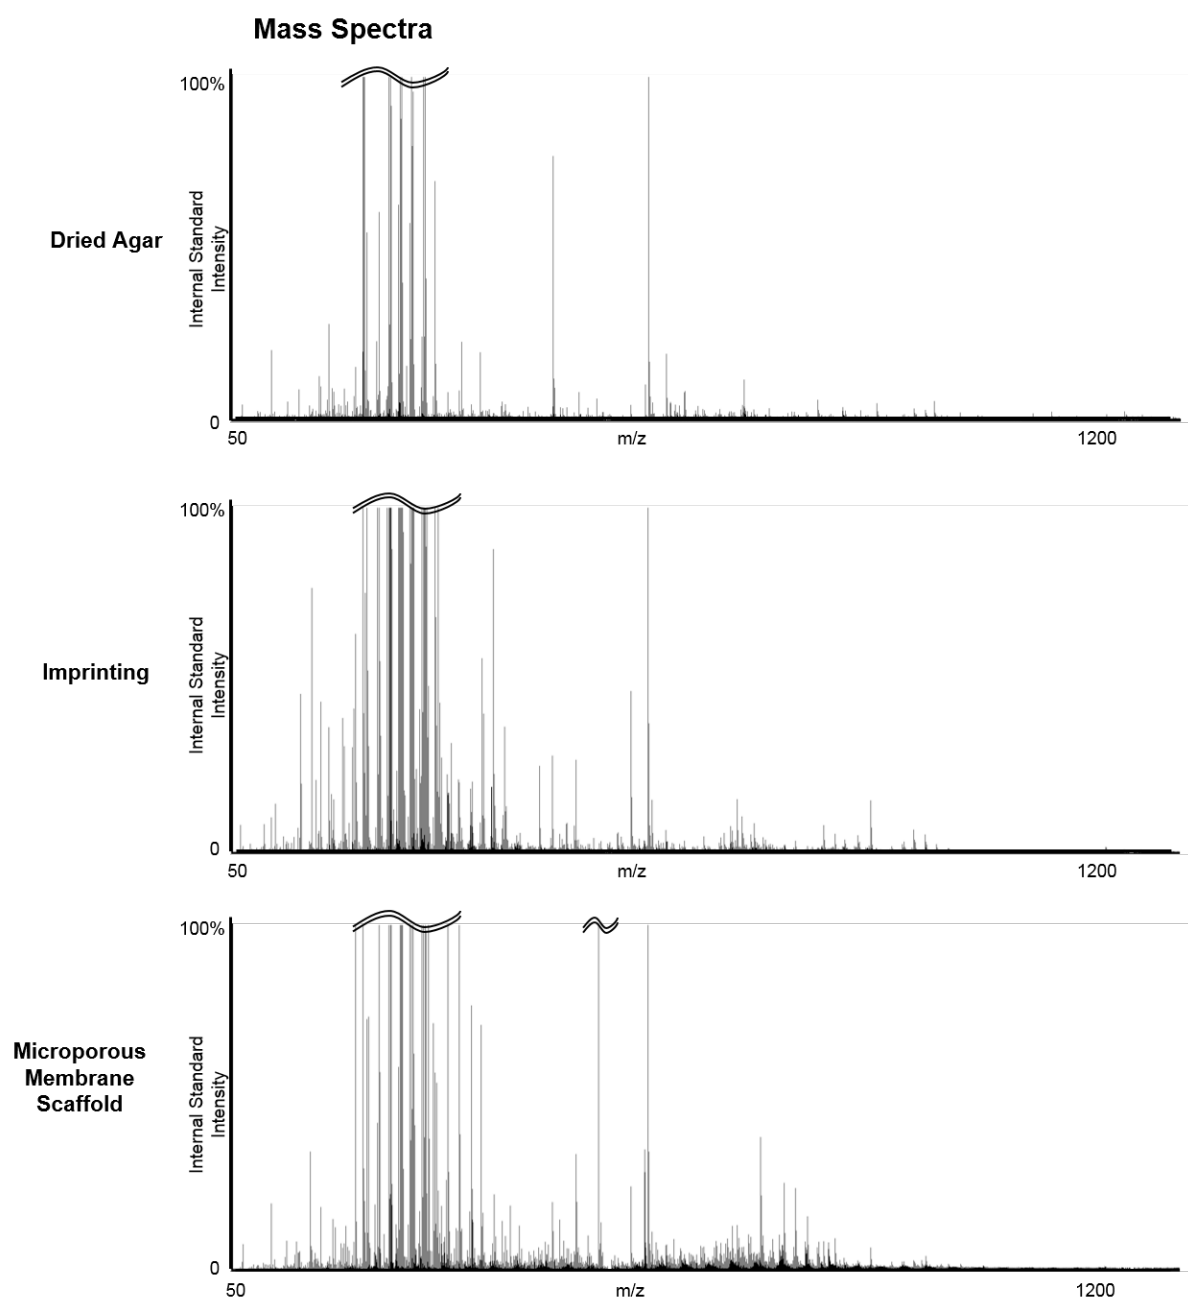

**Figure S3.** Average Mass Spectra of dried agar, imprinting, and microporous membrane scaffold sampling methods. Intensities are shown with the internal standard and lock mass leucine-enkephalin ( $m/z$  554.26) intensity representing 100%.

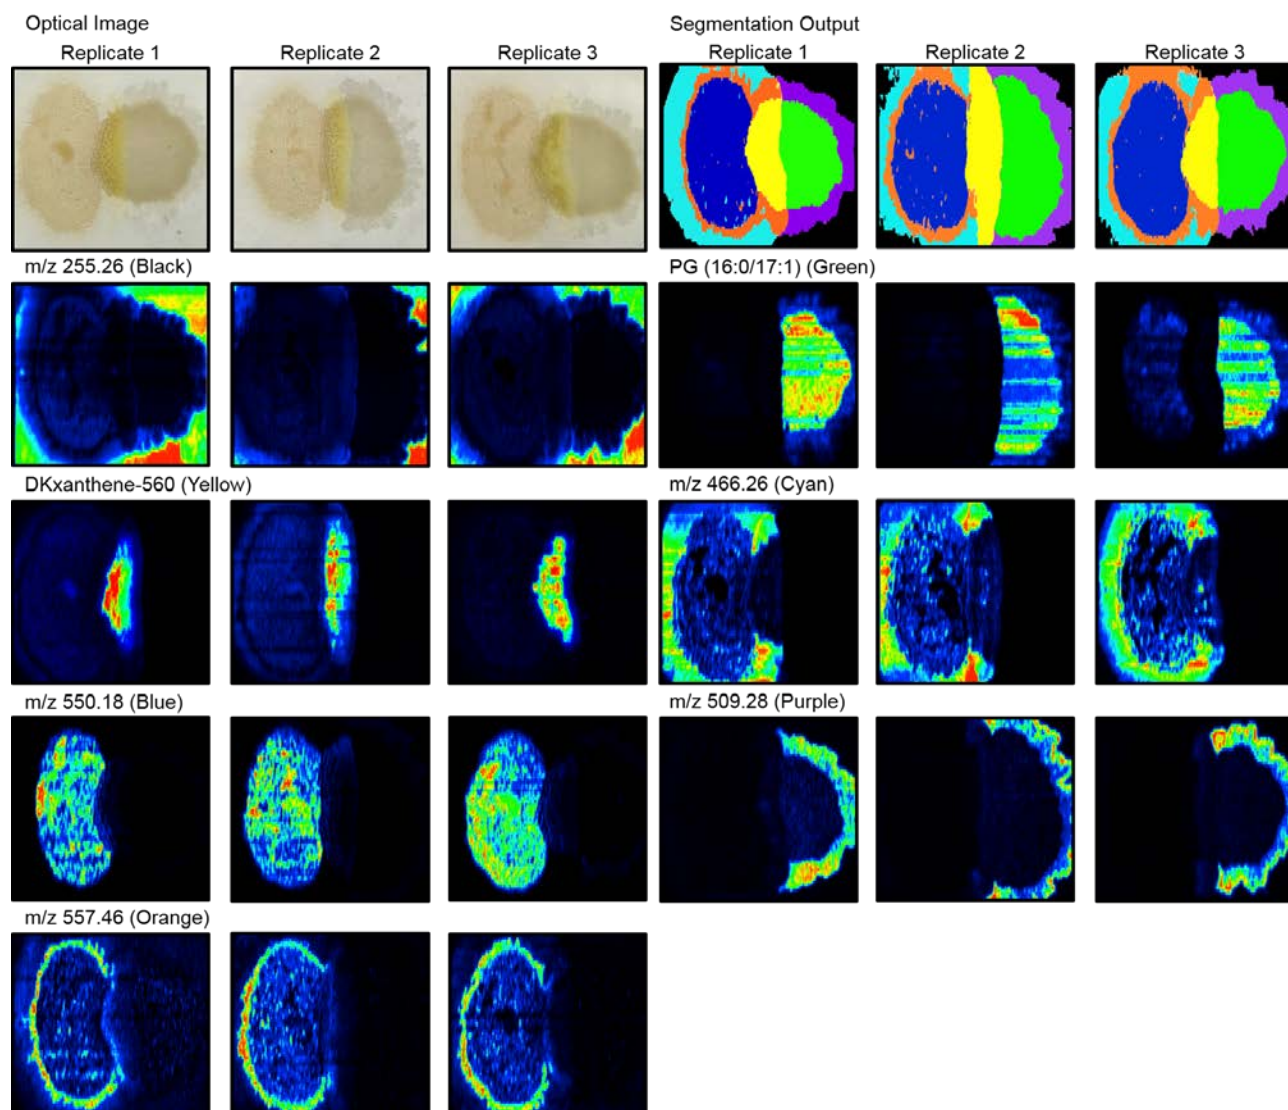

**Figure S4.** Biological replicates of unsupervised segmentation from MMS DESI-IMS. The ion image of the primary contributing feature to each segment is shown across replicates with the segment denoted in parentheses by color.

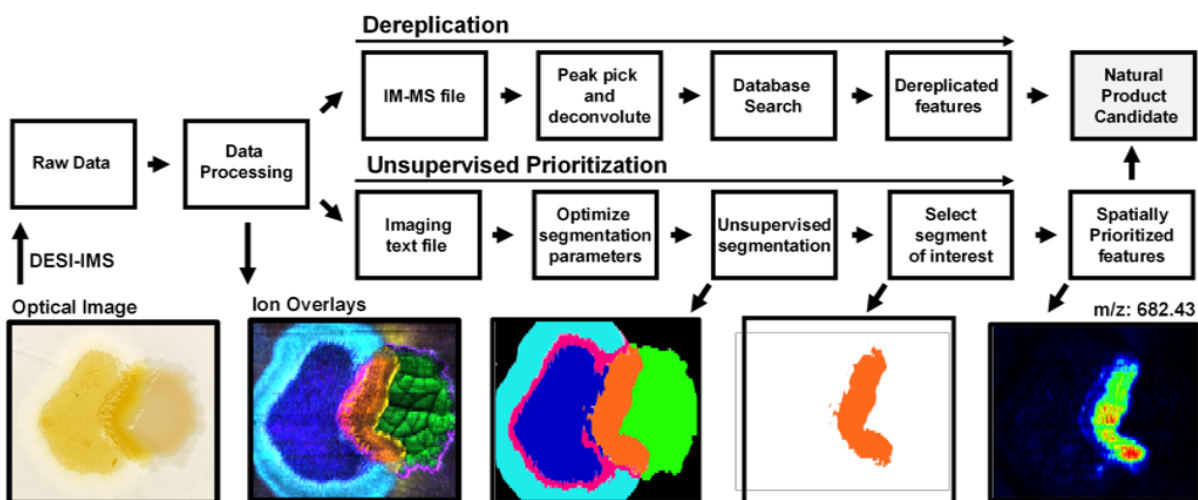

**Figure S5.** Natural product discovery workflow combining unsupervised segmentation and dereplication.

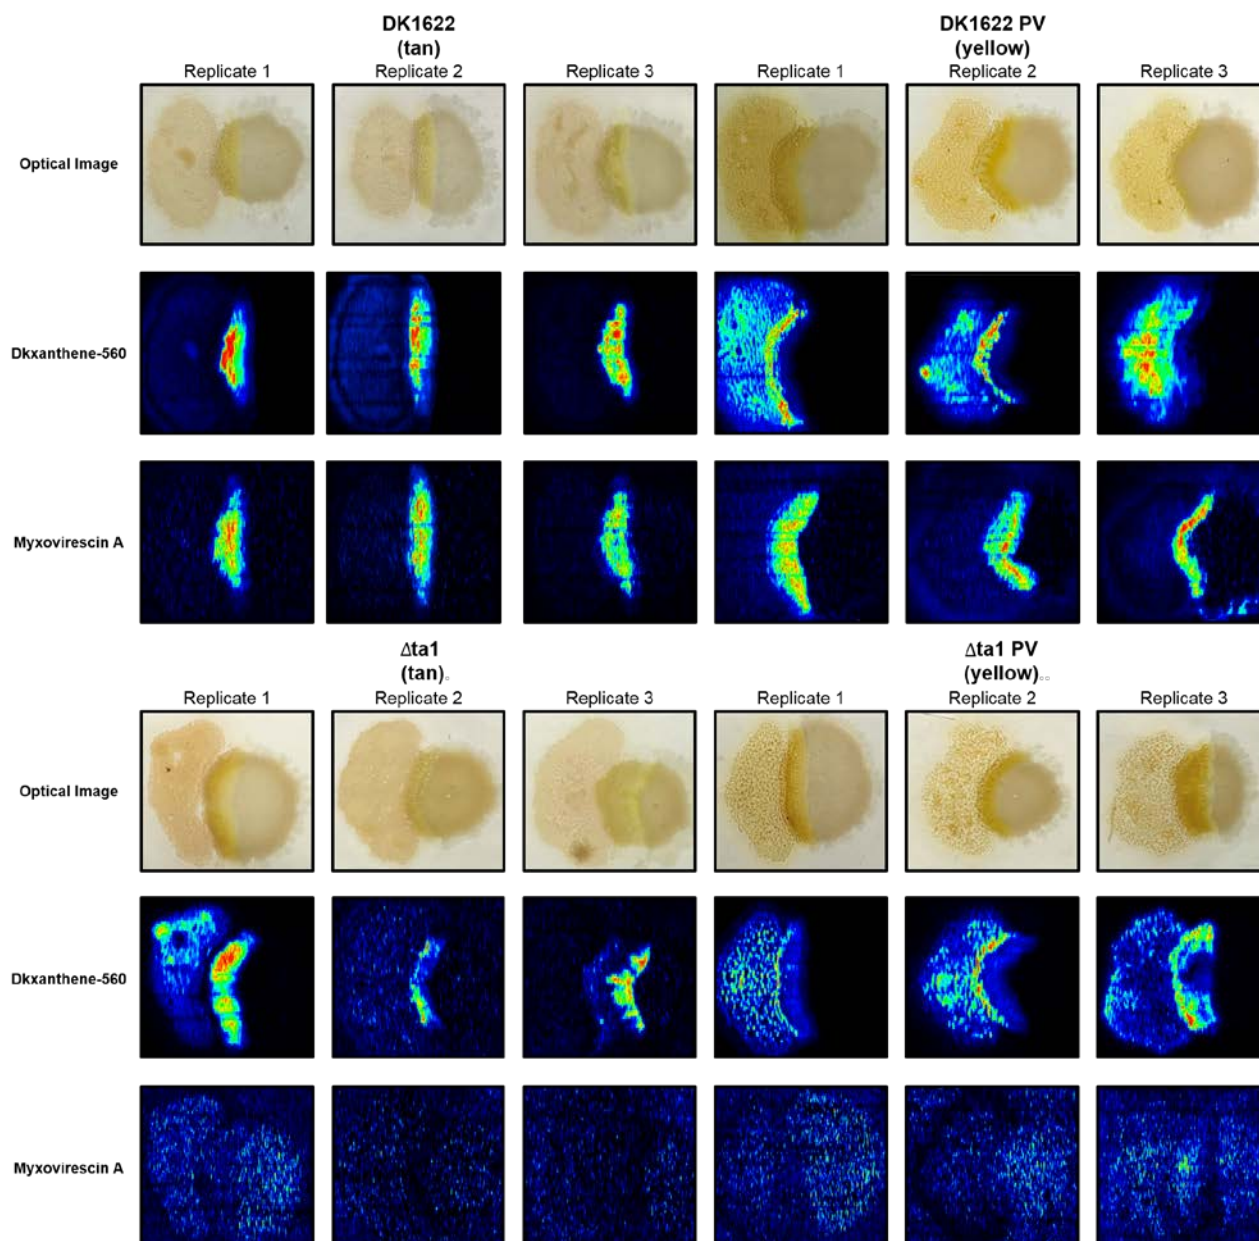

**Figure S6.** Production of reported natural products Myxovirescin A and DKxanthene-560 in biological replicates of WT and *M. xanthus*  $\Delta ta1$  phase variants.

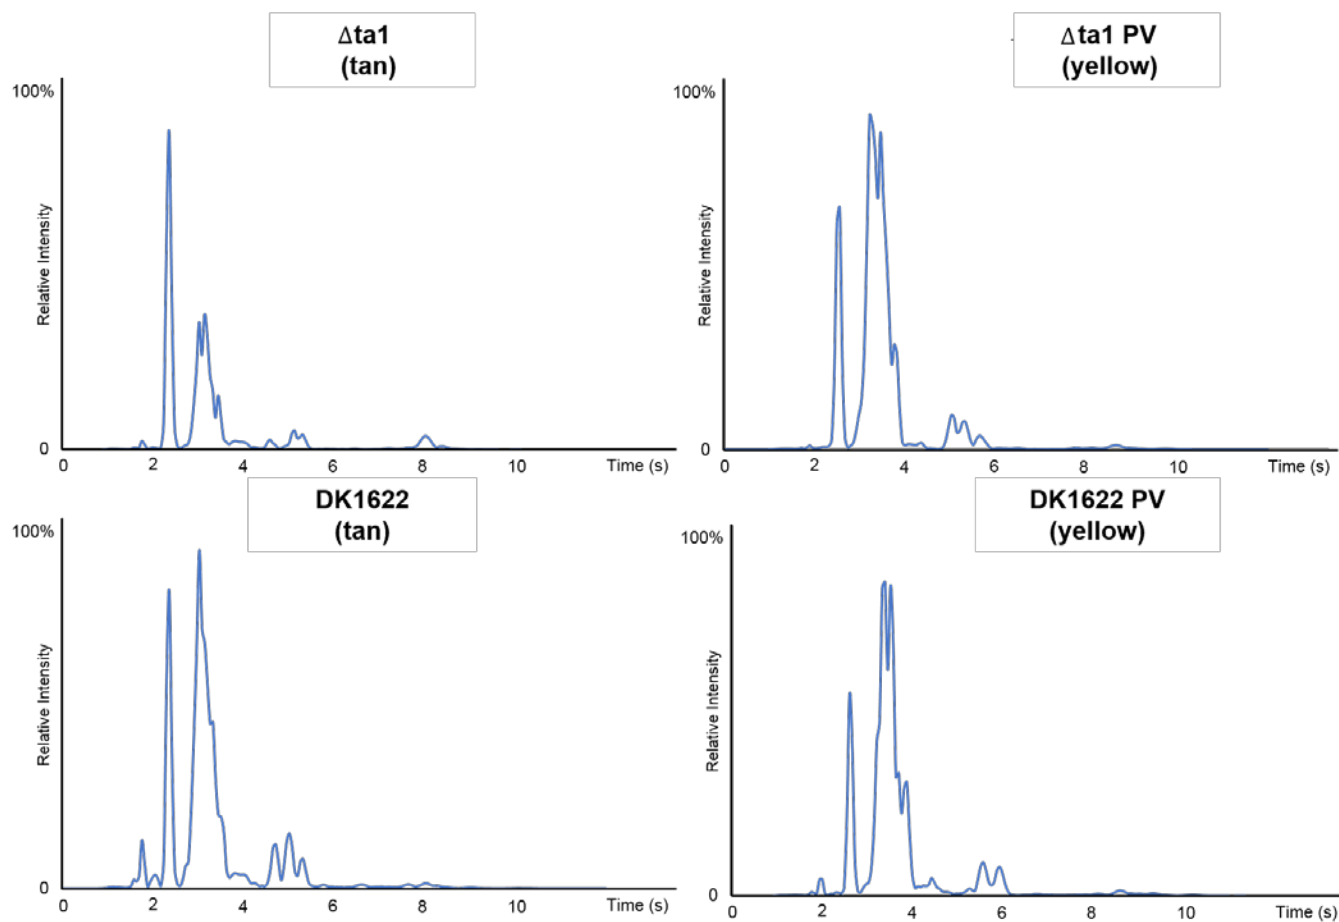

**Figure S7.** Drift time vs relative intensity of WT and *M. xanthus*  $\Delta ta1$  phase variants.

**Table S2.** Observed features with regions resulting from unsupervised segmentation. Columns correspond to: “t-statistic” value denoting their significance in the region, standard deviation of “t-statistic” values across replicates (n=3), identification, molecular formula, adduct, mass accuracy in parts per million (ppm), and normalized intensity.
